# Supplementary material for: Oligonucleotide length- and probe number-dependent assembly of gold nanoparticle on triangular DNA origami
Source: Royal Society of Chemistry journal article supplement (doi:10.1039/c6ra03700c), 2016-01-01
Supplement: c6ra03700c1.pdf [file c6ra03700c1.pdf]

## Oligonucleotide length- and probe number-dependent assembly of gold nanoparticle on triangular DNA origami

Ying Wang,<sup>ab</sup> Long Zou,<sup>ab</sup> Jing Xiao,<sup>ab</sup> Yan Qiao<sup>\*ab</sup> and Zhisong Lu<sup>\*ab</sup>

a. Chongqing Key Laboratory for Advanced Materials & Technologies of Clean Energies, Southwest University, 1 Tiansheng Road, Chongqing 400715, P. R. China;

b. Institute for Clean Energy & Advanced Materials, Faculty of Materials & Energy, Southwest University, 1 Tiansheng Road, Chongqing 400715, P. R. China.

\*Corresponding author: Yan Qiao, E-mail: yanqiao@swu.edu.cn; Fax: 86-23-68253204; Tel: 86-23-68254842 or Zhisong Lu, E-mail: zslu@swu.edu.cn; Fax: 86-23-68253204; Tel: 86-23-68254732.

### 1. Materials

#### 1.1 Abbreviations

TAE: tris acetate-EDTA buffer

BSPP: bis (p-sulfonatophenyl) phenylphosphine dihydrate dipotassium salt

TCEP: tris (2-carboxyethyl) phosphine hydrochloride

0.5 × TBE: 89 mM tris, 89 mM boric acid, 2mM EDTA, pH=8.0

AAM: atomic force microscopy

NAS: nucleic acid stain

#### 1.2 Chemicals

Single-stranded M13mp18 DNA was purchased from New England Biolabs (Catalog number: #N4040S). All staple strands and thiolated ssDNA were purchased from Shanghai Sangon Biotech Inc. (Shanghai, China). TAE was purchased from Beyotime Institute of Biotechnology (Shanghai, China). Magnesium acetate tetrahydrate ( $C_4H_6MgO_4 \cdot 4H_2O$ ), sodium citrate tribasic dehydrate ( $C_6H_5Na_3O_7 \cdot 2H_2O$ ), Tris (2-carboxyethyl) phosphine hydrochloride (TCEP), chloroauric acid ( $HAuCl_4$ ), sodium chloride were bought from Aladdin (Shanghai, China). Bis (p-sulfonatophenyl) phenylphosphine dihydrate dipotassium salt (BSPP) was obtained from Sigma-Aldrich (USA).

EDTA, Tris, boric acid, CH<sub>3</sub>OH, nucleic acid stain (NAS) are of analytical reagent grade. All solutions were prepared with deionized water ( $\geq 18\text{M}\Omega\text{ cm}$ ) generated from a Millipore Q water purification system.

### 1.3 Sequence of the staple ssDNA and thiolated oligonucleotides

DNA origami was prepared according to Rothemund's approach with minor modifications<sup>[1]</sup>.

| Staple name | (DNA sequences, from 5' to 3')              |
|-------------|---------------------------------------------|
| t1s18h,D1,  | AATACTGCGGAATCGTAGGGGGTAATAGTAAAATGTTTAGACT |
| t1s28h,E1,  | TCTTTGATTAGTAATAGTCTGTCCATCACGCAAATTAACCGTT |
| t1s8h,A1,   | CAGAAGGAAACCGAGGTTTTTAAGAAAAGTAAGCAGATAGCCG |
| t1s10g,B2,  | GACGGGAGAATTAAGTTCGGAATAAGTTTATTTCCAGCGCC   |
| t1s12i,C2,  | TCATATGTGTAATCGTAAAAGTATGTCATTTTC           |
| t1s14i,D2,  | GTGAGAAAATGTGTAGGTAAAGATACAACCTTT           |
| t1s16i,E2,  | GGCATCAAATTTGGGGCGCGAGCTAGTTAAAG            |
| t1s18i,A2,  | TTCGAGCTAAGACTTCAAATATCGGGAACGAG            |
| t1s20g,G2,  | GAATACCACATTCAACTTAAGAGGAAGCCCGATCAAAGCG    |
| t1s22i,H2,  | TCGGGAGATATACAGTAACAGTACAAATAATT            |
| t1s24i,A3,  | CCTGATTAAAGGAGCGGAATTATCTCGGCCTC            |
| t1s26i,B3,  | GCAAATCACCTCAATCAATATCTGCAGGTCGA            |
| t1s28i,C3,  | CGACCAGTACATTGGCAGATTCACCTGATTGC            |
| t1s2i,D3,   | CGGGGTTTCCTCAAGAGAAGGATTTTGAATTA            |
| t1s30g,E3,  | TTGACGAGCACGTATACTGAAATGGATTATTTAATAAAAAG   |
| t1s4i,A3,   | AGCGTCATGTCTCTGAATTTACCGACTACCTT            |
| t1s6i,G3,   | TTCATAATCCCCTTATTAGCGTTTTTCTTACC            |
| t1s8i,H3,   | <b>ATGGTTTATGTCACAATCAATAGATATTTAAAC</b>    |
| t2s11g,A4,  | AGAAAAGCCCCAAAAGAGTCTGGAGCAAACAATCACCAT     |
| t2s13g,B4,  | ACAGTCAAAGAGAATCGATGAACGACCCCGGTTGATAATC    |
| t2s15f,C4,  | ATAGTAGTATGCAATGCCTGAGTAGGCCGGAG            |
| t2s17f,D4,  | AACCAGACGTTTAGCTATATTTTCTTCTACTA            |

t2s1g,E4, GATAAGTGCCGTCGAGCTGAAACATGAAAGTATACAGGAG  
t2s21g,A4, CCTGATTGCTTTGAATTGCGTAGATTTTCAGGCATCAATA  
t2s23g,G4, TGGCAATTTTTAACGTCAGATGAAAACAATAACGGATTTCG  
t2s25f,H4, AAGGAATTACAAAGAAACCACCAGTCAGATGA  
t2s27f,A5, GGACATTCACCTCAAATATCAAACACAGTTGA  
t2s3g,B5, TTTGATGATTAAGAGGCTGAGACTTGCTCAGTACCAGGCG  
t2s5f,C5, CCGGAACCCAGAATGGAAAGCGCAACATGGCT  
t2s7f,D5, AAAGACAACATTTTCGGTCATAGCCAAAATCA  
t3s10g,E5, GTCAGAGGGTAATTGATGGCAACATATAAAAGCGATTGAG  
t3s14e,A5, CAATATGACCCTCATATATTTTAAAGCATTAA  
t3s16e,G5, CATCCAATAAATGGTCAATAACCTCGGAAGCA  
t3s18g,H5, AACTCCAAGATTGCATCAAAAAGATAATGCAGATACATAA  
t3s20g,A6, CGCCAAAAGGAATTACAGTCAGAAGCAAAGCGCAGGTCAG  
t3s24e,B6, TAATCCTGATTATCATTTTGCGGAGAGGAAGG  
t3s26e,C6, TTATCTAAAGCATCACCTTGCTGATGGCCAAC  
t3s28g,D6, AGAGATAGTTTGACGCTCAATCGTACGTGCTTTCCTCGTT  
t3s30g,E6, AGAATCAGAGCGGGAGATGGAAATACCTACATAACCCTTC  
t3s4e,A6, TGTACTGGAAATCCTCATTAAGCAGAGCCAC  
t3s6e,G6, CACCGGAAAGCGCGTTTTTCATCGGAAGGGCGA  
t3s8g,H6, CATTCAACAAACGCAAAGACACCAGAACACCCTGAACAAA  
t4s11g,A7, GCAAATATTTAAATTGAGATCTACAAAGGCTACTGATAAA  
t4s13g,B7, CGTTCTAGTCAGGTCATTGCCTGACAGGAAGATTGTATAA  
t4s15f,C7, CAGGCAAGATAAAAATTTTTAGAAATATTCAAC  
t4s17f,D7, GATTAGAGATTAGATACATTTTCGCAAATCATA  
t4s1g,E7, TAGCCCGGAATAGGTGAATGCCCCCTGCCTATGGTCAGTG  
t4s21g,A7, GCGCAGAGGCGAATTAATTATTTGCACGTAAATTCTGAAT  
t4s23g,G7, GATTATACACAGAAATAAAGAAATACCAAGTTACAAAATC  
t4s25f,H7, TAGGAGCATAAAAGTTTGAGTAACATTGTTTG  
t4s27f,A8, TGACCTGACAAATGAAAAATCTAAAATATCTT  
t4s3g,B8, TTTAACGGTTCGGAACCTATTATTAGGGTTGATATAAGTA

t4s5f,C8, CTCAGAGCATATTCACAAACAAATTAATAAGT  
t4s7f,D8, GGAGGGAATTTAGCGTCAGACTGTCCGCCTCC  
t5s10g,E8, GATAACCCACAAGAATGTTAGCAAACGTAGAAAATTATTC  
t5s14e,A8, TTAATGCCTTATTTCAACGCAAGGGCAAAGAA  
t5s16e,G8, TTAGCAAATAGATTTAGTTTGACCAGTACCTT  
t5s18g,H8, TAATTGCTTTACCCTGACTATTATGAGGCATAGTAAGAGC  
t5s20g,A9, AACACTATCATAACCCATCAAAAATCAGGTCTCCTTTTGA  
t5s24e,B9, AATGGAAGCGAACGTTATTAATTTCTAACAAC  
t5s26e,C9, TAATAGATCGCTGAGAGCCAGCAGAAGCGTAA  
t5s28g,D9, GAATACGTAACAGGAAAAACGCTCCTAACAGGAGGCCGA  
t5s30g,E9, TTAAAGGGATTTTAGATACCGCCAGCCATTGCGGCACAGA  
t5s4e,A9, CCTTGAGTCAGACGATTGGCCTTGCGCCACCC  
t5s6e,G9, TCAGAACCCAGAATCAAGTTTGCCGGTAAATA  
t5s8g,H9, TTGACGGAAATACATACATAAAGGGCGCTAATATCAGAGA  
t6s15g,B10, ATAAAGCCTTTGCGGGAGAAGCCTGGAGAGGGTAG  
t6s17f,C10, TAAGAGGTCAATTCTGCGAACGAGATTAAGCA  
t6s25g,E10, TCAATAGATATTAATCCTTTGCCGGTTAGAACCT  
t6s27f,A10, CAATATTTGCCTGCAACAGTGCCATAGAGCCG  
t6s5g,H10, CAGAGCCAGGAGGTTGAGGCAGGTAACAGTGCCCCG  
t6s7f,A11, ATTAAAGGCCGTAATCAGTAGCGAGCCACCCT  
t7s10g,B11, ATAAGAGCAAGAAACATGGCATGATTAAGACTCCGACTTG  
t7s14e,C11, ATGACCCTGTAATACTTCAGAGCA  
t7s16e,D11, TAAAGCTATATAACAGTTGATTCCCATTTTTG  
t7s18g,E11, CGGATGGCACGAGAATGACCATAATCGTTTACCAGACGAC  
t7s20g,A11, GATAAAAACCAAAATATTAAACAGTTCAGAAATTAGAGCT  
t7s24e,G11, ACAATTCGACAACCTCGTAATACAT  
t7s26e,H11, TTGAGGATGGTCAGTATTAACACCTTGAATGG  
t7s28g,A12, CTATTAGTATATCCAGAACAATATCAGGAACGGTACGCCA  
t7s30g,B12, GAATCCTGAGAAGTGTATCGGCCTTGCTGGTACTTTAATG  
t7s4e,C12, GCCGCCAGCATTGACACCACCCTC

t7s6e,D12, AGAGCCGCACCATCGATAGCAGCATGAATTAT  
t7s8g,E12, CACCGTCACCTTATTACGCAGTATTGAGTTAAGCCCAATA  
t8s17g,G12, TAATTGCTTGGAAGTTTCATTCCAAATCGGTTGTA  
t8s27g,A1, CGCGAACTAAAACAGAGGTGAGGCTTAGAAGTATT  
t8s7g,C1, AGCCATTTAAACGTCACCAATGAACACCAGAACCA  
t9s10h,D1, TATCTTACCGAAGCCCAAACGCAATAATAACGAAAATCACCAG  
t9s16e,E1, ACTAAAGTACGGTGTCGAATATAA  
t9s18g,A1, TGCTGTAGATCCCCCTCAAATGCTGCGAGAGGCTTTTGCA  
t9s20h,G1, AAAGAAGTTTTGCCAGCATAAATATTCATTGACTCAACATGTT  
t9s26e,H1, ACCACCAGCAGAAGATGATAGCCC  
t9s28g,A2, TAAAACATTAGAAGAACTCAAACCTTTTTATAATCAGTGAG  
t9s30h,B2, GCCACCGAGTAAAAGAACATCACTTGCCTGAGCGCCATTA  
t9s6e,C2, CCATTAGCAAGGCCGGGGGAATTA  
t9s8g,D2, GAGCCAGCGAATACCCAAAAGAACATGAAATAGCAATAGC  
t-10s17h,E2, ACCAACCTAAAAAATCAACGTAACAAATAAATTGGGCTTGAGA  
t-10s27h,A2, AACTCACATTATTGAGTGTGTTCCAGAAACCGTCTATCAGGG  
t-10s7h,G2, ACGACAATAAATCCCGACTTGCGGGAGATCCTGAATCTTACCA t-  
12s19h,C3, CCTGACGAGAAACACCAGAACGAGTAGGCTGCTCATTGAGTGA t-  
12s29h,D3, ACGTGGACTCCAACGTCAAAGGGCGAATTTGGAACAAGAGTCC t-  
12s9h,E3, TGCTATTTTGCACCCAGCTACAATTTTGTGTTTGAAGCCTTAAA  
t-1s10e,A3, **AGAGAATAACATAAAAAACAGGGAAGCGCATT**  
t-1s12i,G3, AGGGATAGCTCAGAGCCACCACCCCATGTCAA  
t-1s14e,H3, ATTTTCTGTCAGCGGAGTGAGAATACCGATAT  
t-1s14i,A4, CAACAGTTTATGGGATTTTGCTAATCAAAGG  
t-1s16e,B4, ATTCGGTCTGCGGGATCGTCACCCGAAATCCG  
t-1s16i,C4, GCCGCTTTGCTGAGGCTTGCAGGGGAAAAGGT  
t-1s18g,D4, CGACCTGCGGTCAATCATAAGGGAACGGAACAACATTATT  
t-1s18i,E4, GCGCAGACTCCATGTACTTAGCCCGTTTTAA  
t-1s20e,A4, ACAGGTAGAAAGATTCATCAGTTGAGATTTAG  
t-1s22i,G4, CGCGTCTGATAGGAACGCCATCAACTTTTACA

t-1s24e,H4, CAGTTTGACGCACTCCAGCCAGCTAAACGACG t-  
1s24i,A5, AGGAAGATGGGGACGACGACAGTAATCATATT t-  
1s26e,B5, GCCAGTGCGATCCCCGGGTACCGAGTTTTTCT  
t-1s26i,C5, CTCTAGAGCAAGCTTGCATGCCTGGTCAGTTG  
t-1s28g,D5, TTTCACCAGCCTGGCCCTGAGAGAAAGCCGGCGAACGTGG  
t-1s28i,E5, CCTTCACCGTGAGACGGGCAACAGCAGTCACA  
t-1s2i,A5, CCTTTTTTTCATTTAACAATTCATAGGATTAG  
t-1s30e,G5, CGAGAAAGGAAGGGAAGCGTACTATGGTTGCT  
t-1s4e,H5, TTATCAAACCGGCTTAGGTTGGGTAAAGCCTGT  
t-1s4i,A6, TTTAACCTATCATAGGTCTGAGAGTTCCAGTA  
t-1s6e,B6, TTAGTATCGCCAACGCTCAACAGTCGGCTGTC  
t-1s6i,C6, AGTATAAAATATGCGTTATACAAAGCCATCTT  
t-1s8g,D6, TTTCCTTAGCACTCATCGAGAACAATAGCAGCCTTTACAG  
t-1s8i,E6, **CAAGTACCTCATTCCAAGAACGGGAAATTCAT**  
t-2s11g,A6, CCTCAGAACCGCCACCCAAGCCCAATAGGAACGTAAATGA  
t-2s13g,G6, AGACGTTACCATGTACCGTAACACCCCTCAGAACCGCCAC  
t-2s15f,H6, CACGCATAAGAAAGGAACA ACTAAGTCTTTCC  
t-2s17f,A7, ATTGTGTCTCAGCAGCGAAAGACACCATCGCC  
t-2s1g,B7, AAAACAAAATTAATTAATGGAAACAGTACATTAGTGAAT  
t-2s21g,C7, GCTCATTTTTTAACCAGCCTTCCTGTAGCCAGGCATCTGC  
t-2s23g,D7, GTAACCGTCTTTCATCAACATTA AAAATTTTTGTAAATCA  
t-2s25f,E7, ACGTTGTATTCCGGCACCGCTTCTGGCGCATC  
t-2s27f,A7, CCAGGGTGGCTCGAATTCGTAATCCAGTCACG  
t-2s3g,G7, AGAGTCAAAAATCAATATATGTGATGAAACAAACATCAAG  
t-2s5f,H7, ACTAGAAATATATAACTATATGTACGCTGAGA  
t-2s7f,A8, TCAATAATAGGGCTTAATTGAGAATCATAATT  
t-3s10g,B8, AACGTCAAAAATGAAAAGCAAGCCGTTTTTATGAAACCAA  
t-3s14e,C8, GTTTTGTCAGGAATTGCCAATAATCCGACAAT  
t-3s16e,D8, GACAACAAGCATCGGAACGAGGGTGAGATTTG  
t-3s18g,E8, TATCATCGTTGAAAGAGGACAGATGGAAGAAAAATCTACG

t-3s20g,A8, TTAATAAAACGAACTAACCGAACTGACCAACTCCTGATAA  
t-3s24e,G8, TGTAGATGGGTGCCGAAACCAGGAACGCCAG  
t-3s26e,H8, GGTTTTCCATGGTCATAGCTGTTTGAGAGGCG  
t-3s28g,A9, GTTTGCGTCACGCTGGTTTGCCCCAAGGGAGCCCCCGATT  
t-3s30g,B9, TAGAGCTTGACGGGGAGTTGCAGCAAGCGGTCATTGGGCG  
t-3s4e,C9, GATTAAGAAATGCTGATGCAAATCAGAATAAA  
t-3s6e,D9, CACCGGAATCGCCATATTTAACAAAATTTACG  
t-3s8g,E9, AGCATGTATTTTCATCGTAGGAATCAAACGATTTTTTTGTTT  
t-4s11g,A9, AGGTTTAGTACCGCCATGAGTTTCGTCACCAGGATCTAAA  
t-4s13g,G9, AGCGTAACTACAACTACAACGCCTATCACCGTACTCAGG  
t-4s15f,H9, TAGTTGCGAATTTTTTTCACGTTGATCATAGTT  
t-4s17f,A10, GTACAACGAGCAACGGCTACAGAGGATACCGA  
t-4s1g,B10, GAGCAAAAGAAGATGAGTGAATAACCTTGCTTATAGCTTA t-  
4s21g,C10, GTTAAAATTCGCATTAATGTGAGCGAGTAACACACGTTGG t-  
4s23g,D10, GGATAGGTACCCGTCGGATTCTCCTAAACGTTAATATTTT  
t-4s25f,E10, AGTTGGGTCAAAGCGCCATTCGCCCCGTAATG  
t-4s27f,A10, CGCGCGGGCCTGTGTGAAATTGTTGGCGATTA  
t-4s3g,G10, ACATAGCGCTGTAAATCGTCGCTATTCATTTCAATTACCT  
t-4s5f,H10, GTTAAATACAATCGCAAGACAAAGCCTTGAAA  
t-4s7f,A11, CCCATCCTCGCCAACATGTAATTTAATAAGGC  
t-5s10g,B11, TCCCAATCCAAATAAGATTACCGCGCCCAATAAATAATAT  
t-5s16e,D11, AACAGCTTGCTTTGAGGACTAAAGCGATTATA  
t-5s18g,E11, CCAAGCGCAGGCGCATAGGCTGGCAGAACTGGCTCATTAT  
t-5s20g,A11, ACCAGTCAGGACGTTGGAACGGTGTACAGACCGAAACAAA  
t-5s26e,H11, TGCTGCAAATCCGCTCACAATTCCCAGCTGCA  
t-5s28g,A12, TTAATGAAGTTTGATGGTGGTCCGAGGTGCCGTAAAGCA  
t-5s30g,C12, CTAAATCGGAACCCTAAGCAGGCGAAAATCCTTCGGCCAA  
t-5s6e,D12, GTGTGATAAGGCAGAGGCATTTTCAGTCCTGA  
t-5s8g,E12, ACAAGAAAGCAAGCAAATCAGATAACAGCCATATTATTTA  
t-6s13f,A12, ACAGACAGCCCAAATCTCCAAAAAAAATTTCTTA

t-6s15c,G12, CGAGGTGAGGCTCCAAAAGGAGCC  
t-6s17f,H12, ACCCCCAGACTTTTTTCATGAGGAACTTGCTTT  
t-6s23f,A1, CGGCGGATTGAATTCAGGCTGCGCAACGGGGGATG  
t-6s25c,B1, TGGCGAAATGTTGGGAAGGGCGAT  
t-6s27f,C1, TGTCGTGCACACAACATACGAGCCACGCCAGC  
t-6s3f,D1, TCCCTTAGAATAACGCGAGAAAACCTTTTACCGACC  
t-6s5c,E1, GTTTGAAATTCAAATATATTTTAG  
t-6s7f,A1, AATAGATAGAGCCAGTAATAAGAGATTTAATG  
t-7s10g,G1, GCCAGTTACAAAATAATAGAAGGCTTATCCGGTTATCAAC t-  
7s18g,A2, AAAACACTTAATCTTGACAAGAACTTAATCATTGTGAATT t-  
7s20g,B2, ACCTTATGCGATTTTATGACCTTCATCAAGAGCATCTTTG  
t-7s28g,D2, TTCCAGTCCTTATAAATCAAAGAGAACCATCACCCAAAT  
t-7s30g,E2, CAAGTTTTTTGGGGTCGAAATCGGCAAATCCGGGAAACC  
t-7s8g,G2, GCGCCTGTTATTCTAAGAACGCGATTCCAGAGCCTAATTT  
t-7s8g,G2, GCGCCTGTTATTCTAAGAACGCGATTCCAGAGCCTAATTT  
t-8s15f,H2, CGGTTTATCAGGTTTCCATTAAACGGGAATACACT  
t-8s17c,A3, GGCAAAGTAAAATACGTAATGCC  
t-8s25f,B3, TCTTCGCTATTGGAAGCATAAAGTGTATGCCCGCT  
t-8s27c,C3, GCGCTCACAAGCCTGGGGTGCCTA  
t-8s5f,D3, TTCTGACCTAAAATATAAAGTACCGACTGCAGAAC  
t-8s7c,E3, TCAGCTAAAAAAGGTAAAGTAATT  
t-9s10g,A3, ACGCTAACGAGCGTCTGGCGTTTTAGCGAACCCAACATGT  
t-9s20g,H3, TGGTTAATTTCAACTCGGATATTCATTACCCACGAAAGA  
t-9s30g,B4, CGATGGCCCACTACGTATAGCCCGAGATAGGGATTGCGTT  
ts-rem1, D4, GCGCTTAATGCGCCGCTACAGGGC  
t-5s2e-t6s23c-3T,A6, TTAATTAATTTTTTACCATATCAAA  
t-7s4e-t8s25c-2T,B6, TTAATTCATCTTAGACTTTACAA  
t-9s6e-t10s27c-1T,C6, CTGTCCAGACGTATACCGAACGA  
t-11s8e-t12s29c-0T,D6, TCAAGATTAGTGTAGCAATACT  
t-5s12e-t6s3c-3T,E6, TGTAGCATTCTTTTATAAACAGTT









## 2. Preparation of DNA origami

The single-strand M13mp18 virus DNA and the staple strands (including the modified ones) were mixed in a molar ratio of 1:10 in the  $1 \times \text{TAE} \sim \text{Mg}^{2+}$  buffer (40 mM Tris, 20 mM acetic acid, 1 mM EDTA, 12.5 mM magnesium acetate). The mixture was annealed from 95°C to 20°C in a PCR instrument (1°C/100s).<sup>[1]</sup> The products were filtered with centrifugal filters using the washing buffer ( $1 \times \text{TAE} \sim \text{Mg}^{2+}$  buffer) for three times to remove excess staple strands.<sup>[2]</sup>

## 3. Modification of AuNPs

AuNP-DNA conjugates were synthesized according to Ding's route.<sup>[3]</sup> Briefly, 15 mg BSPP was dissolved in a 50 mL AuNPs solution, followed by a stirring in dark at room temperature for 12 hours. Solid sodium chloride was added in slowly until the color of the solution changes from wine red to lilac. The products were collected by centrifugation at 10000 rpm for 15 min and re-suspended in a mixture of BSPP and CH<sub>3</sub>OH. After a second round of centrifugation, the AuNPs were suspended in 1mL BSPP (2.5mM). Thiolated oligonucleotides were activated with TCEP (10mM) for several hours and then incubated with the AuNPs at a molar ratio of 200:1 in a  $0.5 \times$  TBE buffer containing 50 mM NaCl for 40 hours at room temperature. After washing with the buffer for three times, the oligonucleotides-conjugated AuNPs were harvested via centrifugation. The UV-vis spectra of the final products were measured to determine the concentration according to Wolfgang Haiss's method.<sup>[4]</sup>

## 4. Assembly of AuNPs with the modified DNA origami templates

The conjugated AuNPs were mixed with the modified DNA origami templates. The mixture was cooled from 43 to 20 °C to allow the hybridization of the complementary ssDNA for the assembly of AuNPs with the modified DNA origami templates.<sup>[3]</sup>

## 5. AFM characterization

A freshly cleaved mica was pre-treated with a MgCl<sub>2</sub> solution. The adsorbed Mg<sup>2+</sup> ions could facilitate the attachment of negatively charged DNA origami and AuNPs. Then, 10 μL sample were dropped on the mica surface, drying in air for 6 hours.<sup>[5]</sup> The AAM images were scanned with a Dimension Icon scanning probe microscope (Bruker, USA) at ambient conditions.

## 6. Gel electrophoresis

The resulting DNA origami-AuNPs were loaded on 1.0% agarose gels with (5  $\mu$ L NAS) and run for three hours at 100V. <sup>[6] [7]</sup> The gel images were photographed using a digital camera system (Chemi XR5).

## 7. Data analysis

Data were collected from at least 4 runs of independent experiments. Differences between different groups were tested for significance using Student's t test (Origin 6.0).

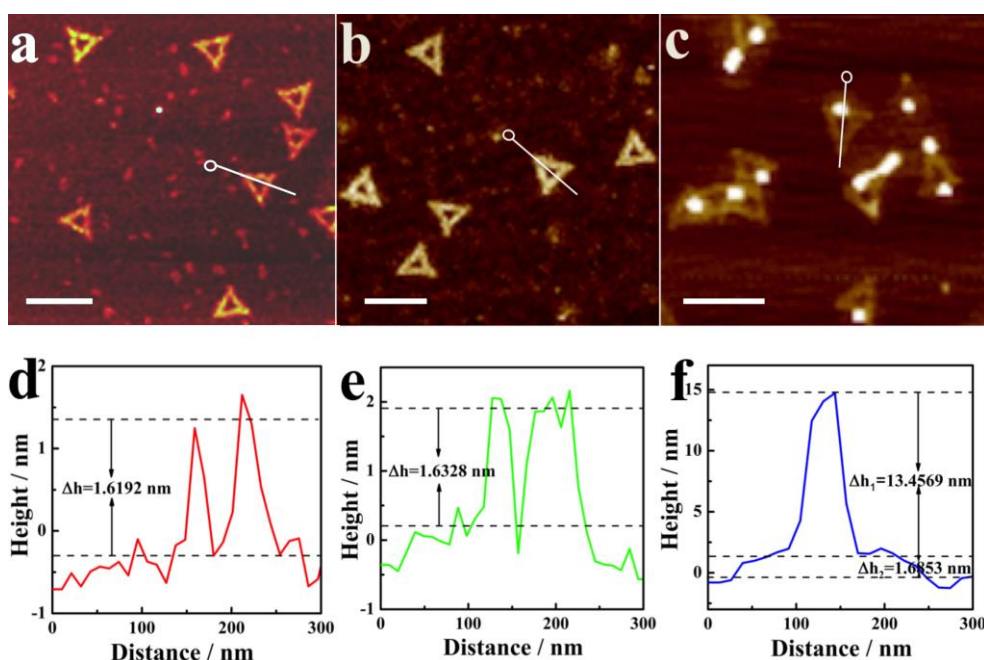

**Fig. S2** AAM images of (a) DNA origami triangles, (b) DNA origami triangles modified with a single strand DNA probe and (c) AuNP-attached DNA origami triangles. Height profiles of (d) a DNA origami triangle, (e) a DNA origami triangle modified with a single strand DNA probe and (f) a AuNP-attached DNA origami triangle.

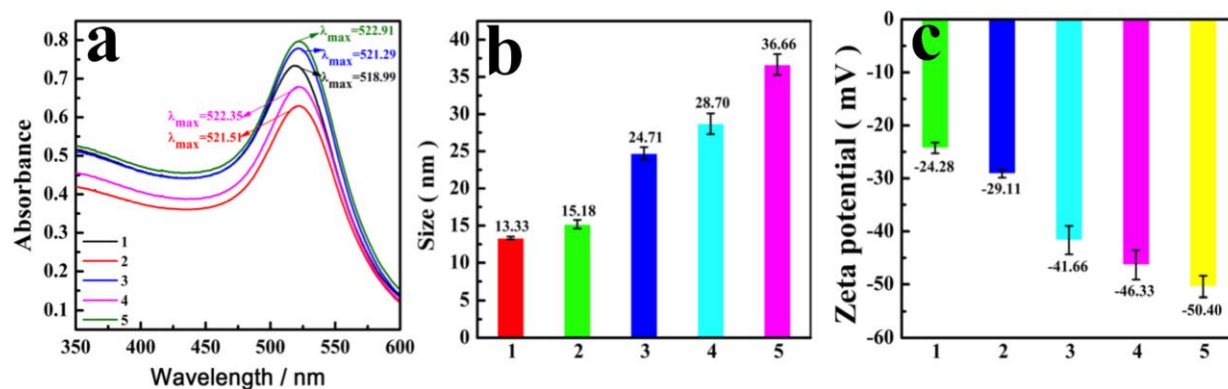

**Fig. S3** UV-vis spectra (a), hydrodynamic size (b) and zeta potential (c) of AuNPs before and after modification with BSPP and ssDNA. Data in (b) and (c) are presented as the average  $\pm$  standard deviation from three independent measurements. The numbers 1, 2, 3, 4 and 5 correspond to AuNPs, BSPP-AuNPs, 20-mer DNA-BSPP-AuNPs, 40-mer DNA-BSPP-AuNPs and 60-mer DNA-BSPP-AuNPs, respectively.

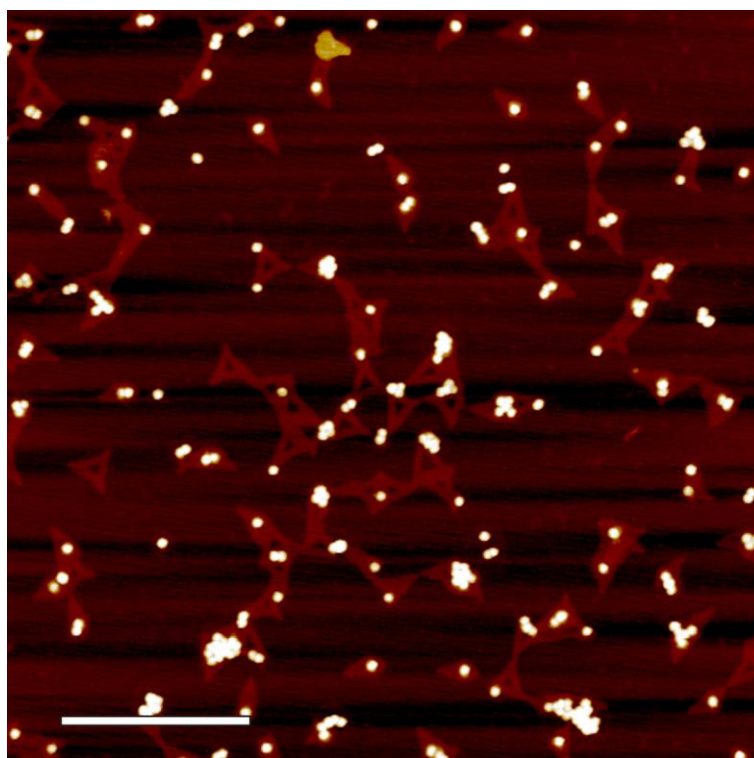

**Fig. S4** AAM image of the DNA origami attached 40-mer DNA-BSPP-AuNPs.

## References

- [1] P. W. Rothmund, *Nature* **2006**, 440, 297.
- [2] Z. Zhao, Y. Liu, H. Yan, *Nano letters*. **2011**, 11(7): 2997-3002.

- [3] B. Q. Ding, Z. T. Deng, H. Yan, S. Cabrini, R. N. Zuckermann, J. Bokor, *J. AM. CHEM. SOC*, **2010**, 132, 3248.
- [4] Haiss W, Thanh N T K, Aveyard J, Aernig. D G. *Analytical chemistry*, **2007**, 79(11): 4215-4221.
- [5] A. Keller, I. Bald, A. Rotaru, E. Cauët, K. V. Gothelf, A. Besenbacher, *ACS nano*, **2012**, 6(5), 4392-4399.
- [6] S. Bidault, A. Polman, *International Journal of Optics*, **2012**.
- [7] X. Shen, C. Song, J. Wang, D. Shi, Z. Wang, N. Liu, B. Ding, *Journal of the American Chemical Society*, **2011**, 134(1), 146-149.
